# Supplementary material for: Different Stress-Induced Calcium Signatures Are Reported by Aequorin-Mediated Calcium Measurements in Living Cells of Aspergillus fumigatus
Source: PubMed Central journal article supplement (PMC4581630; doi:10.1371/journal.pone.0138008), 2015-09-24
Supplement: pone.0138008.s001.pdf [file pone.0138008.s001.pdf]

1 **SUPPLEMENTARY DATA 1.** Sequence of plasmids constructed in this study.

2 pAEQ(I)

3 In red the half sequence of the PmeI site after the cloning

4 PmeI

5 CAGACATCACCGTTTATGACCTCCAAGCAGTACTCCGTCAAGCTTACCTCCGACTTCGACAA  
6 CCCCCGCTGGATCGGCCGCCACAAGCACATGTTCAACTTCCTCGACGTCAACCACAACGGCA  
7 AGATTTCCTCGACGAGATGGTCTACAAGGCCTCCGACATCGTCATCAACAACCTCGGCGCT  
8 ACCCCCGAGCAGGCCAAGCGCCACAAGGACGCCGTGAGGCCTTCTTCGGCGGTGCCGGCAT  
9 GAAGTACGGCGTCGAGACCGACTGGCCCCGCTACATCGAGGGCTGGAAGAAGCTCGCCACCG  
10 ACGAGCTCGAGAAGTACGCCAAGAACGAGCCCACCCTCATCCGCATCTGGGGCGACGCCCTC  
11 TTCGACATCGTCGACAAGGACCAGAACGGTGCCATCACCTCGACGAGTGGAAGGCCTACAC  
12 CAAGGCCGCCGGCATCATTTCAGTCCAGCGAGGACTGCGAAGAGACCTTCCGCGTCTGCGACA  
13 TCGACGAGTCCGGCCAGCTCGATGTCGATGAGATGACCCGCCAGCACCTCGGCTTCTGGTAC  
14 ACCATGGACCCCGCCTGCGAGAAGCTCTACGGCGGTGCCGTCCCCTAAAAACGCCATGTCTA

15 PmeI

16

17 pAEQ(II)

18 In red the half sequence of the SfiI restriction site

19 SfiI

*ku80*<sup>5'</sup>

20 TCGAGCTCGGTACGGCCATATAGGCCCATGAAGGCGCATCTGCACGATGCGCGACTCCATCT  
21 CACAAGACGGGACCAGGAAACGACGCCGCAAAGCAGCATGAGAGCTCTGCGCGGGCGAAGA  
22 GCAGTCTTGTACGAGCTGGAAGTCTGATCGGGGCGCTGGAGGACGGCCTGAAGAATCTTGGG  
23 GATGCCAATGCGGATGCGAGGTCCACTGCGTCTGGGAAGAGGGGTGCTTGGGGGAGCGGAAA  
24 TGGGCTGGGCGACGGGGAGATTTCGACGAAGAAAGGACTTGCTGGTTAATGCGAAGAAGGAGA  
25 AGAATGGATTGGAGGATTTGTAAACGCCATGGCTGCTAAGAGCAGGATTGATAATGCGGTT  
26 GCGTCGATAACAAGACAAGGAGGCGTTGGTTGGGTCTGCGAGCCGGAAGCCACCTCGTTTCGGG

27 GAGGGTGCTGGGCAAGGAGACGGAGCGGACTCGCGAGCTAGATAACCAAGGCGTTTTGCAGT  
28 TACAGAAGCGGACGATGGAGGATCAAGATATGAGCATTGAAGAGTTGAGGAAGATTGTACAA  
29 CGCCAGAAGGAACTGGGGATTGCTATCAATGCTGAGTTGGAGATTCAGAATGAGCTTCTGAA  
30 GCTCACGGATGAAGATACGGACAGGTATGTGTGGACCCAGGCTTCGGCTCTAATAACCCATT  
31 CTAACATCTGTGCGCTAAAGGTTAGGGAAGAAGATCGAAATCGGGAACAAGAGGGTTGGCAA  
32 AATATCTTAGCTTGGCATCTCACGGGCACTTCTGCTTCTACACAGCTTATTCATTGTTTCTG

33

*gpdA<sup>P</sup>*

34 AACCATTTAGAGGAGCGACTATCTTTGCCCGGTGTATGAAACCGGAAAGGCCGCTCAGGAGC  
35 TGGCCAGCGGCGCAGACCGGGAACACAAGCTGGCAGTCGACCCATCCGGTGCTCTGCACTCG  
36 ACCTGCTGAGGTCCCTCAGTCCCTGGTAGGCAGCTTTGCCCGTCTGTCCGCCCGGTGTGTC  
37 GCGGGGTTGACAAGGTCGTTGCGTCAGTCCAACATTTGTTGCCATATTTTCTGCTCTCCC  
38 CACCAGCTGCTCTTTTCTTTTCTTTTCTTTTCCCATCTTCAGTATATTCATCTTCCCATCC  
39 AAGAACC<sup>3</sup>TTTATTTCCCCTAAGTAAGTACTTTGCTACATCCATACTCCATCCTTCCCATCCC  
40 TTATTCCTTTGAACCTTTCAGTTCGAGCTTCCCAC<sup>3</sup>TTTCATCGCAGCTTGACTAACAGCTAC

41

*aeqS*

42 CCCGCTTGAGCAGACATCACCGTTTATGACCTCCAAGCAGTACTCCGTCAAGCTTACCTCCG  
43 ACTTCGACAACCCCCGCTGGATCGGCCGCCACAAGCACATGTTCAACTTCCTCGACGTCAAC  
44 CACAACGGCAAGATTTCCCTCGACGAGATGGTCTACAAGGCCTCCGACATCGTCATCAACAA  
45 CCTCGGCGCTACCCCCGAGCAGGCCAAGCGCCACAAGGACGCCGTCGAGGCCTTCTTCGGCG  
46 GTGCCGGCATGAAGTACGGCGTCGAGACCGACTGGCCCGCTACATCGAGGGCTGGAAGAAG  
47 CTCGCCACCGACGAGCTCGAGAAGTACGCCAAGAACGAGCCACCCTCATCCGCATCTGGGG  
48 CGACGCCCTTTCGACATCGTCGACAAGGACCAGAACGGTGCCATCACCTTCGACGAGTGGA  
49 AGGCCTACACCAAGGCCGCGGCATCATTTCAGTCCAGCGAGGACTGCGAAGAGACCTTCCGC  
50 GTCTGCGACATCGACGAGTCCGGCCAGCTCGATGTCGATGAGATGACCCGCCAGCACCTCGG

51

*ku80<sup>3'</sup>*

52 CTTCTGGTACACCATGGACCCCGCCTGCGAGAAGCTCTACGGCGGTGCCGTCCCCTAAGATC  
53 AAGATGCTCTAGAATAGAAATTGAGTCAGGGCATGAGGGAAGGAAGAGCCAGATAAAGGTAG  
54 CTCATTGATGCATGGACAAACACGACTCTCCAGGCAGACGCGCAATATTTCCCGATTGGGTG  
55 TTAGGCAGAACGCGAAGGCACATGACATCATTAATGGAAGGTGCGTGGACATTGCACGTAGT  
56 AAGTGTACATACTTCGGGTCCAATGAAAAGCCGTTGCACCTGTCATATTCCGCAGGACGGGT  
57 GCGTCGAAATATGTTCCGGCATTCCCTAGCTCTTCATCTTCCAACAACCATCTGATCCCGTC  
58 TTGTGCTCTTATCTGCATCCGAATATCCCAGACCCAGCAGTTGACAGATTATAAAGTGCATC  
59 ATTAATTGCTGGACAGGCAATATGACTGATCCTCGCCCCTACCATCTTCTTAGGTACAGAAT  
60 CCCTGGTTATCAGGATGTGAACATGTCGCTGACTTCGGGCGCAAGCTACGGTACCCTATTGG  
61 GTGTGCAAGTGTCCCAGGTGAACTTCATTCTGCCAGCTAGATATCCACTACGCTGTAACTC  
62 AAAGGCGCAACAGACATTTATTGGGGGCGTTATTGCTTTCCGAGTGCTCCCTCGTCCTCAGT  
63 TCTCAGCGTTGCAAACCTTCGATATTCCCGGTGTACTTCACGCTTCAGTCCGCACTCCCCGTA  
64 GTTATCGCCTTGACTTCCAGCAAAGGTGGCCAGCTCAATGGCATTTCGGGACTTCTCGCTCC  
65 SfiI  
66 TGAAAGTCGATTTGGGACACTCCTGCCTCTCGCAACTGTTGCAGTGTCTGGGGGCCTATATG  
67 GCCGGCATGCAAGCTTG
