# Supplementary material for: Different Stress-Induced Calcium Signatures Are Reported by Aequorin-Mediated Calcium Measurements in Living Cells of Aspergillus fumigatus
Source: PubMed Central journal article supplement (PMC4581630; doi:10.1371/journal.pone.0138008), 2015-09-24

# S1 Fig.

**A**

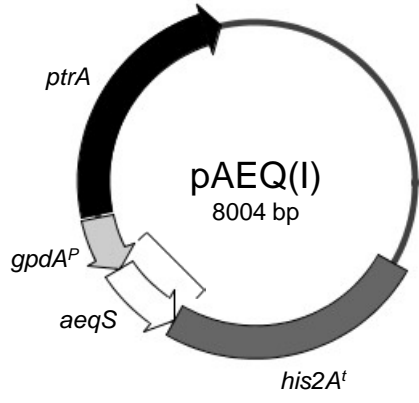

**B**

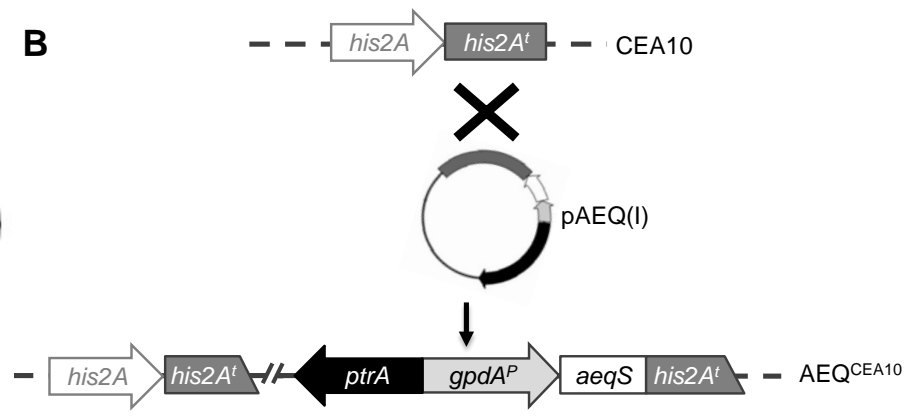

**C**

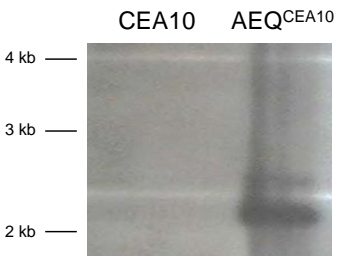

**D**

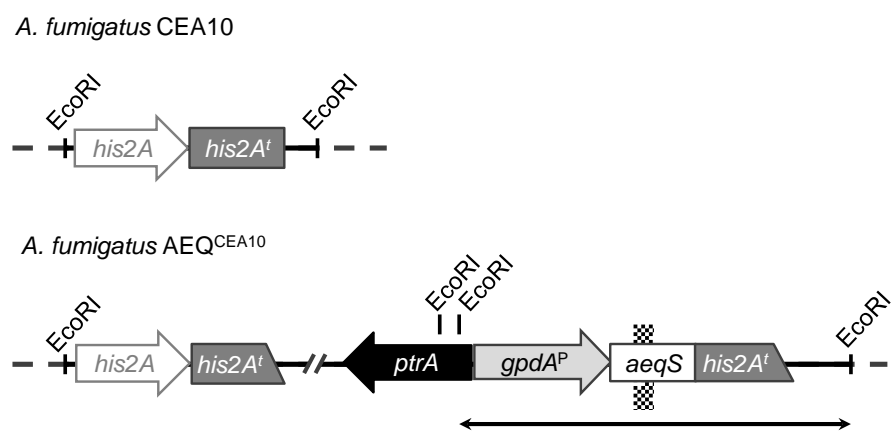

Supplement: pone.0138008.s002.pdf [file pone.0138008.s002.pdf]
