# Supplementary material for: Different Stress-Induced Calcium Signatures Are Reported by Aequorin-Mediated Calcium Measurements in Living Cells of Aspergillus fumigatus
Source: PubMed Central journal article supplement (PMC4581630; doi:10.1371/journal.pone.0138008), 2015-09-24

S4 Fig.

CEA10

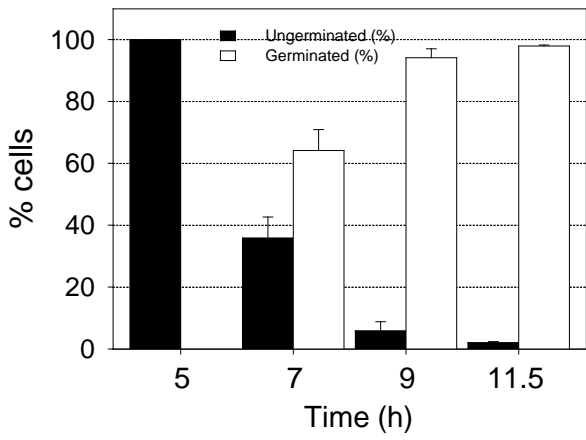

AEQ<sup>CEA10</sup>

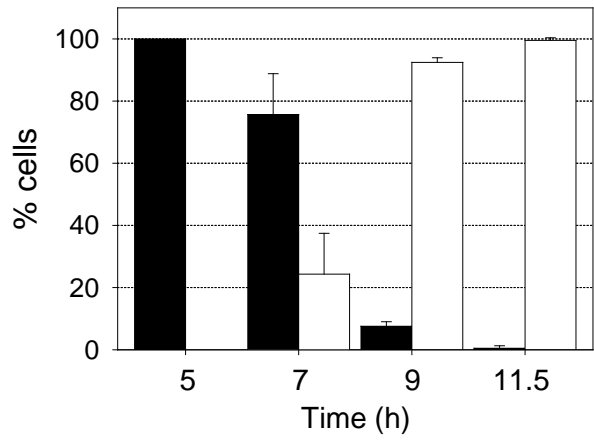

$\DeltaakuB$ <sup>KU80</sup>

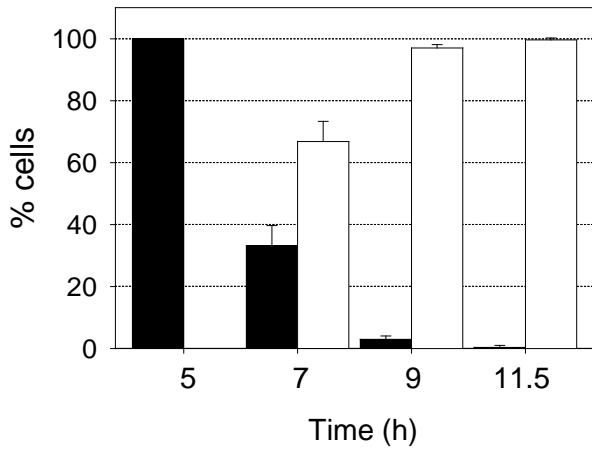

AEQ <sup>$\DeltaakuB$</sup>

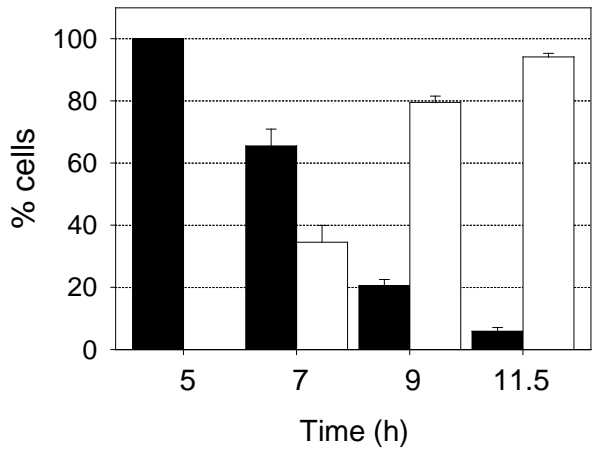

Supplement: pone.0138008.s005.pdf [file pone.0138008.s005.pdf]
