# Supplementary material for: Different Stress-Induced Calcium Signatures Are Reported by Aequorin-Mediated Calcium Measurements in Living Cells of Aspergillus fumigatus
Source: PubMed Central journal article supplement (PMC4581630; doi:10.1371/journal.pone.0138008), 2015-09-24

S8 Fig.

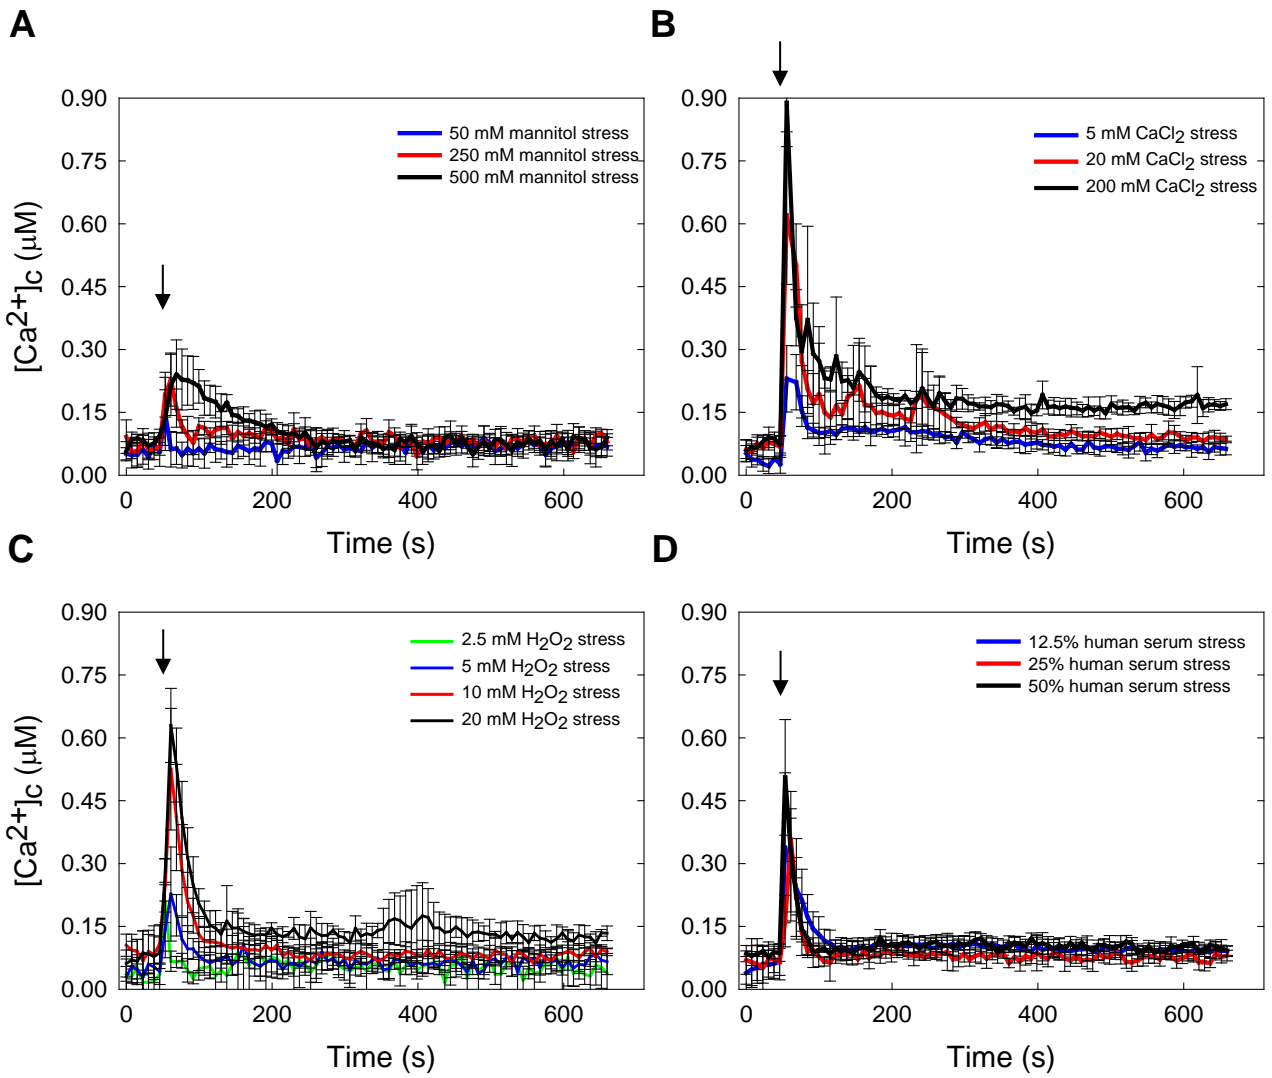

Supplement: pone.0138008.s009.pdf [file pone.0138008.s009.pdf]
