# Supplementary material for: Different Stress-Induced Calcium Signatures Are Reported by Aequorin-Mediated Calcium Measurements in Living Cells of Aspergillus fumigatus
Source: PubMed Central journal article supplement (PMC4581630; doi:10.1371/journal.pone.0138008), 2015-09-24
Supplement: pone.0138008.s011.pdf [file pone.0138008.s011.pdf]

**TABLE S1.** Effect of the available aequorin on the  $[Ca^{2+}]_c$  resting level

| Strain                                      | Conditions                                     | Total RLU | Average resting $[Ca^{2+}]_c$ ( $\mu$ M) | SD    |
|---------------------------------------------|------------------------------------------------|-----------|------------------------------------------|-------|
| AEQ <sup><math>\Delta</math>akuB</sup> 2.8  | AMM (5 mM uracil, 10 mM uridine) – 28°C – 18 h | 624093    | 0.464                                    | 0.053 |
| AEQ <sup><math>\Delta</math>akuB</sup> 2.4  | AMM (5 mM uracil, 10 mM uridine) – 28°C – 18 h | 938017    | 0.326                                    | 0.085 |
| AEQ <sup>CEA10</sup> 5                      | AMM – 25°C – 18 hr                             | 961793    | 0.449                                    | 0.079 |
| AEQ <sup><math>\Delta</math>akuB</sup> 2.6  | AMM (5 mM uracil, 10 mM uridine) – 28°C – 18 h | 1055935   | 0.332                                    | 0.061 |
| AEQ <sup><math>\Delta</math>akuB</sup> 2.10 | AMM (5 mM uracil, 10 mM uridine) – 28°C – 18 h | 1065205   | 0.324                                    | 0.088 |
| AEQ <sup><math>\Delta</math>akuB</sup> 2.9  | AMM (5 mM uracil, 10 mM uridine) – 28°C - 18 h | 1160440   | 0.304                                    | 0.058 |
| AEQ <sup><math>\Delta</math>akuB</sup> 2.11 | AMM (5 mM uracil, 10 mM uridine) – 28°C – 18 h | 1180644   | 0.303                                    | 0.074 |
| AEQ <sup><math>\Delta</math>akuB</sup> 2.9  | AMM (5 mM uracil, 10 mM uridine) – 28°C – 18 h | 1731557   | 0.252                                    | 0.049 |
| AEQ <sup><math>\Delta</math>akuB</sup> 2.1  | AMM (5 mM uracil, 10 mM uridine) – 25°C – 21 h | 1939192   | 0.226                                    | 0.054 |
| AEQ <sup><math>\Delta</math>akuB</sup> 2.1  | AMM (5 mM uracil, 10 mM uridine) – 28°C – 18 h | 2038444   | 0.237                                    | 0.044 |
| AEQ <sup><math>\Delta</math>akuB</sup> 2.1  | AMM (5 mM uracil, 10 mM uridine) – 28°C – 18 h | 2637253   | 0.211                                    | 0.049 |
| AEQ <sup>CEA10</sup> 5                      | AMM – 28°C – 18 h                              | 3097941   | 0.228                                    | 0.043 |
| AEQ <sup>CEA10</sup> 5                      | AMM – 28°C – 18 h                              | 3146863   | 0.260                                    | 0.045 |

|                                            |                                                 |          |       |       |
|--------------------------------------------|-------------------------------------------------|----------|-------|-------|
| AEQ <sup><math>\DeltaakuB</math></sup> 2.1 | AMM (25 mM uracil, 50 mM uridine) – 25°C - 24h  | 3193179  | 0.138 | 0.055 |
| AEQ <sup><math>\DeltaakuB</math></sup> 2.1 | AMM (5 mM uracil, 10 mM uridine) – 28°C – 18 h  | 3455570  | 0.178 | 0.033 |
| AEQ <sup><math>\DeltaakuB</math></sup> 2.1 | AMM (25 mM uracil, 50 mM uridine) – 25°C – 24 h | 3543011  | 0.135 | 0.038 |
| AEQ <sup>CEA10</sup> 5                     | AMM – 28°C – 18 h                               | 3616656  | 0.194 | 0.029 |
| AEQ <sup>CEA10</sup> 5                     | AMM – 28°C – 18 h                               | 3854462  | 0.176 | 0.037 |
| AEQ <sup><math>\DeltaakuB</math></sup> 2.9 | AMM (5 mM uracil, 10 mM uridine) – 28°C – 18 h  | 4015167  | 0.161 | 0.047 |
| AEQ <sup>CEA10</sup> 5                     | AMM – 25°C – 21 h                               | 12224360 | 0.089 | 0.028 |
| AEQ <sup><math>\DeltaakuB</math></sup> 2.1 | AMM (5 mM uracil, 10 mM uridine) – 25°C – 24 h  | 13909430 | 0.056 | 0.025 |
| AEQ <sup>CEA10</sup> 5                     | AMM – 25°C – 21 h                               | 15003427 | 0.074 | 0.029 |
| AEQ <sup>CEA10</sup> 5                     | AMM – 25°C – 21 h                               | 15831152 | 0.083 | 0.017 |
| AEQ <sup>CEA10</sup> 5                     | AMM – 25°C – 24 h                               | 15924636 | 0.058 | 0.020 |
| AEQ <sup>CEA10</sup> 5                     | AMM – 28°C – 18 h                               | 16456851 | 0.064 | 0.021 |
| AEQ <sup>CEA10</sup> 5                     | AMM – 28°C – 18 h                               | 19937514 | 0.068 | 0.017 |
| AEQ <sup>CEA10</sup> 5                     | AMM – 25°C – 24 h                               | 20607932 | 0.069 | 0.028 |
| AEQ <sup>CEA10</sup> 5                     | AMM – 28°C – 18 h                               | 29573819 | 0.039 | 0.022 |
| AEQ <sup>CEA10</sup> 5                     | AMM – 28°C – 18 h                               | 34441942 | 0.032 | 0.013 |

|                        |                   |          |       |       |
|------------------------|-------------------|----------|-------|-------|
| AEQ <sup>CEA10</sup> 5 | AMM – 25°C – 21 h | 36856896 | 0.033 | 0.023 |
| AEQ <sup>CEA10</sup> 5 | AMM - 28°C – 20 h | 37253064 | 0.021 | 0.015 |
| AEQ <sup>CEA10</sup> 5 | AMM - 25°C – 24 h | 39650605 | 0.032 | 0.028 |
| AEQ <sup>CEA10</sup> 5 | AMM - 28°C – 21 h | 42805129 | 0.040 | 0.036 |
| AEQ <sup>CEA10</sup> 5 | AMM - 28°C – 18 h | 55274954 | 0.045 | 0.035 |
| AEQ <sup>CEA10</sup> 5 | AMM - 25°C – 21 h | 73901209 | 0.021 | 0.026 |

---

AMM: *Aspergillus* minimal medium

SD: standard deviation
